# Supplementary material for: Identification of AURKA as a Biomarker Associated with Cuproptosis and Ferroptosis in HNSCC
Source: MDPI journal article supplement (doi:10.3390/ijms25084372), 2024-04-16

**Table S1.** Top 100 cuproptosis-associated ferroptosis genes in HNSCC

| <b>cuproptosis</b> | <b>Ferroptosis Genes</b> | <b>Cor</b>  | <b>p Value</b> | <b>Regulation</b> |
|--------------------|--------------------------|-------------|----------------|-------------------|
| CDKN2A             | CDKN2A                   | 1           | 0              | postive           |
| NFE2L2             | NFE2L2                   | 1           | 0              | postive           |
| DLST               | EIF2S1                   | 0.817432531 | 2.40E-122      | postive           |
| DBT                | SP1                      | 0.70157193  | 6.80E-76       | postive           |
| DLAT               | ATM                      | 0.658107698 | 7.26E-64       | postive           |
| MTF1               | MTOR                     | 0.639692958 | 2.37E-59       | postive           |
| LIPT1              | TUBE1                    | 0.634959132 | 3.06E-58       | postive           |
| DBT                | SCP2                     | 0.602100285 | 4.90E-51       | postive           |
| DBT                | ELAVL1                   | 0.584570475 | 1.60E-47       | postive           |
| ATP7A              | SETD1B                   | 0.581901928 | 5.24E-47       | postive           |
| DBT                | IREB2                    | 0.581725364 | 5.67E-47       | postive           |
| ATP7A              | SP1                      | 0.580481826 | 9.83E-47       | postive           |
| ATP7A              | IREB2                    | 0.576942963 | 4.64E-46       | postive           |
| NFE2L2             | GCLC                     | 0.572322862 | 3.42E-45       | postive           |
| MTF1               | SETD1B                   | 0.572178078 | 3.64E-45       | postive           |
| DBT                | YY1AP1                   | 0.570538155 | 7.34E-45       | postive           |
| DBT                | SIRT1                    | 0.568788384 | 1.54E-44       | postive           |
| DBT                | MTOR                     | 0.567541288 | 2.62E-44       | postive           |
| PDHA1              | GOT1                     | 0.566024746 | 4.95E-44       | postive           |
| DBT                | NRAS                     | 0.565364775 | 6.53E-44       | postive           |
| DBT                | PRKAA1                   | 0.562041175 | 2.61E-43       | postive           |
| DBT                | SETD1B                   | 0.561490878 | 3.28E-43       | postive           |
| NFE2L2             | PIK3CA                   | 0.55995498  | 6.17E-43       | postive           |
| MTF1               | MAPK14                   | 0.559916628 | 6.27E-43       | postive           |
| NFE2L2             | ABCC1                    | 0.556400652 | 2.64E-42       | postive           |
| DBT                | CS                       | 0.553708273 | 7.84E-42       | postive           |
| NFE2L2             | BRD4                     | 0.550169833 | 3.23E-41       | postive           |
| ATP7A              | LAMP2                    | 0.54506974  | 2.42E-40       | postive           |
| ATP7A              | SIRT1                    | 0.543876837 | 3.85E-40       | postive           |
| NFE2L2             | TP63                     | 0.543726278 | 4.08E-40       | postive           |
| ATP7A              | LPCAT3                   | 0.541777322 | 8.69E-40       | postive           |
| DLAT               | SLC38A1                  | 0.540953292 | 1.20E-39       | postive           |
| NFE2L2             | MAFG                     | 0.538592561 | 2.96E-39       | postive           |
| ATP7A              | ATM                      | 0.536770414 | 5.93E-39       | postive           |
| NFE2L2             | KLHL24                   | 0.535610501 | 9.21E-39       | postive           |
| DLAT               | PRKAA1                   | 0.532677833 | 2.78E-38       | postive           |
| DBT                | MAPK8                    | 0.528899677 | 1.14E-37       | postive           |
| DBT                | MAPK14                   | 0.527287186 | 2.07E-37       | postive           |
| DLAT               | EIF2AK4                  | 0.524356373 | 6.05E-37       | postive           |
| DLAT               | MTDH                     | 0.524044758 | 6.78E-37       | postive           |
| ATP7A              | PIK3CA                   | 0.523929467 | 7.07E-37       | postive           |
| LIPT1              | ISCU                     | 0.523776011 | 7.48E-37       | postive           |

|        |         |             |          |         |
|--------|---------|-------------|----------|---------|
| ATP7A  | BECN1   | 0.522901502 | 1.03E-36 | postive |
| NFE2L2 | YY1AP1  | 0.519899958 | 3.04E-36 | postive |
| ATP7A  | ABCC1   | 0.517185215 | 8.04E-36 | postive |
| DBT    | BECN1   | 0.515007365 | 1.74E-35 | postive |
| PDHB   | FANCD2  | 0.514674186 | 1.96E-35 | postive |
| MTF1   | STAT3   | 0.5141412   | 2.36E-35 | postive |
| GCSH   | PHKG2   | 0.512525163 | 4.17E-35 | postive |
| DLD    | CS      | 0.512339869 | 4.46E-35 | postive |
| NFE2L2 | KEAP1   | 0.512291918 | 4.53E-35 | postive |
| DBT    | ACVR1B  | 0.51055166  | 8.32E-35 | postive |
| DLAT   | IREB2   | 0.509228633 | 1.32E-34 | postive |
| MTF1   | BACH1   | 0.508937704 | 1.46E-34 | postive |
| MTF1   | NCOA4   | 0.50694671  | 2.90E-34 | postive |
| MTF1   | SP1     | 0.506823538 | 3.03E-34 | postive |
| DBT    | SLC38A1 | 0.506061936 | 3.94E-34 | postive |
| DBT    | ATM     | 0.505635352 | 4.56E-34 | postive |
| NFE2L2 | IDH1    | 0.502821114 | 1.19E-33 | postive |
| DLAT   | MTOR    | 0.499185278 | 4.07E-33 | postive |
| ATP7A  | BRD4    | 0.498983757 | 4.35E-33 | postive |
| DBT    | MAPK1   | 0.497816446 | 6.43E-33 | postive |
| DLAT   | ACSL4   | 0.496154449 | 1.12E-32 | postive |
| DBT    | HELLS   | 0.495378323 | 1.45E-32 | postive |
| DBT    | LPCAT3  | 0.492415286 | 3.85E-32 | postive |
| DBT    | NCOA4   | 0.492333854 | 3.95E-32 | postive |
| ATP7A  | KLHL24  | 0.49212242  | 4.24E-32 | postive |
| DLAT   | CS      | 0.49064745  | 6.87E-32 | postive |
| PDHB   | STMN1   | 0.490441755 | 7.34E-32 | postive |
| ATP7A  | STAT3   | 0.489476178 | 1.01E-31 | postive |
| DBT    | SNX4    | 0.489044299 | 1.16E-31 | postive |
| GCSH   | PRDX6   | 0.488586001 | 1.34E-31 | postive |
| MTF1   | OXSRI   | 0.484080343 | 5.72E-31 | postive |
| ATP7A  | MAPK1   | 0.482153166 | 1.06E-30 | postive |
| LIPT1  | BID     | 0.480397852 | 1.84E-30 | postive |
| DLST   | MTDH    | 0.47988248  | 2.17E-30 | postive |
| DBT    | EIF2AK4 | 0.479235168 | 2.66E-30 | postive |
| MTF1   | IREB2   | 0.478907884 | 2.94E-30 | postive |
| DBT    | ZFP69B  | 0.478284654 | 3.58E-30 | postive |
| ATP7A  | NFE2L2  | 0.478034824 | 3.87E-30 | postive |
| DLAT   | BECN1   | 0.477490354 | 4.59E-30 | postive |
| ATP7A  | NCOA4   | 0.476937447 | 5.46E-30 | postive |
| DLD    | ASNS    | 0.476369757 | 6.51E-30 | postive |
| ATP7A  | MTOR    | 0.472186626 | 2.37E-29 | postive |
| GLS    | ANO6    | 0.471632069 | 2.81E-29 | postive |
| DBT    | FANCD2  | 0.471026363 | 3.39E-29 | postive |

|        |         |             |          |          |
|--------|---------|-------------|----------|----------|
| NFE2L2 | ATP5MC3 | 0.469292343 | 5.75E-29 | positive |
| DBT    | STAT3   | 0.468317733 | 7.73E-29 | positive |
| DBT    | RIPK1   | 0.4671899   | 1.09E-28 | positive |
| NFE2L2 | SP1     | 0.466877127 | 1.20E-28 | positive |
| DLAT   | LPCAT3  | 0.466831171 | 1.21E-28 | positive |
| NFE2L2 | ELAVL1  | 0.465515097 | 1.80E-28 | positive |
| ATP7A  | MAFG    | 0.465022552 | 2.09E-28 | positive |
| NFE2L2 | TFRC    | 0.464530247 | 2.42E-28 | positive |
| NFE2L2 | GPX2    | 0.463018026 | 3.80E-28 | positive |
| DLST   | YWHAE   | 0.462827088 | 4.03E-28 | positive |
| LIPT1  | GLS2    | 0.460947243 | 7.04E-28 | positive |
| DLAT   | SETD1B  | 0.459866565 | 9.68E-28 | positive |
| DBT    | MAP3K5  | 0.459849703 | 9.73E-28 | positive |
| DLAT   | ANO6    | 0.459051522 | 1.23E-27 | positive |

---

Table S2. Top 10 KEGG pathway

| Description                                       |   | <i>p</i> Value | Gene ID                                                                                                                                                                 | Count |
|---------------------------------------------------|---|----------------|-------------------------------------------------------------------------------------------------------------------------------------------------------------------------|-------|
| Autophagy animal                                  | - | 6.9823E-23     | EIF2AK4/ATG4D/ATG3/WIP1/ATG16L1/GABARAPL1/GABARAPL2/ATG7/ATG13/ULK2/ATG5/SQSTM1/BECN1/ULK1/MAPK9/MAPK8/MAPK1/PRKAA1/PIK3CA/NRAS/LAMP2/KRAS/HRAS/HMGB1/HIF1A/MTOR/EIF2S1 | 27    |
| Mitophagy animal                                  | - | 5.8526E-15     | GABARAPL1/GABARAPL2/ATG5/SQSTM1/BECN1/ULK1/TP53/SP1/RELA/MAPK9/MAPK8/NRAS/KRAS/HRAS/HIF1A/ATF4                                                                          | 16    |
| Lipid and atherosclerosis                         |   | 8.6848E-15     | NOX1/XBP1/TP53/TLR4/STAT3/RELA/MAPK9/MAPK8/MAPK1/PIK3CA/NRAS/NFE2L2/NCF2/MAP3K5/KRAS/HSPA5/HRAS/CXCL2/EIF2S1/DDIT3/CYBB/MAPK14/BID/ATF4                                 | 24    |
| Ferroptosis                                       |   | 1.4451E-14     | SLC40A1/ATG7/LPCAT3/ATG5/NCOA4/VDAC2/TP53/TFRC/GPX4/GCLC/ACSL4/ACSL3/CYBB                                                                                               | 13    |
| Autophagy other                                   | - | 1.4928E-14     | ATG4D/ATG3/WIP1/ATG16L1/GABARAPL1/GABARAPL2/ATG7/ATG13/ULK2/ATG5/BECN1/MTOR                                                                                             | 12    |
| FoxO signaling pathway                            |   | 8.5487E-12     | GABARAPL1/SIRT1/GABARAPL2/TGFBR1/STAT3/MAPK9/MAPK8/MAPK1/PRKAA1/PIK3CA/PCK2/NRAS/KRAS/HRAS/MAPK14/CDKN1A/ATM                                                            | 17    |
| Chemical carcinogenesis - reactive oxygen species | - | 1.377E-11      | NOX1/KEAP1/AKR1C3/VDAC2/RELA/MAPK9/MAPK8/MAPK1/PIK3CA/NRAS/NFE2L2/NCF2/MAP3K5/KRAS/HRAS/HIF1A/NQO1/AKR1C2/AKR1C1/MAPK14/ATP5MC3                                         | 21    |
| Central carbon metabolism in cancer               |   | 2.6905E-11     | GLS2/SLC7A5/TP53/SLC1A5/MAPK1/PIK3CA/NRAS/KRAS/IDH1/HRAS/HIF1A/G6PD/MTOR                                                                                                | 13    |
| Kaposi sarcoma-associated herpesvirus infection   |   | 7.2091E-11     | ATG3/BECN1/TP53/STAT3/RELA/RB1/MAPK9/MAPK8/MAPK1/PIK3CA/NRAS/KRAS/HRAS/HIF1A/CXCL2/MTOR/MAPK14/CDKN1A/BID                                                               | 19    |
| Pancreatic cancer                                 |   | 8.0192E-11     | TP53/TGFBR1/STAT3/RELA/RB1/MAPK9/MAPK8/MAPK1/PIK3CA/KRAS/MTOR/CDKN2A/CDKN1A                                                                                             | 13    |

**Figure S1.** The Single immune gene infiltration characteristics of 12 cuproptosis-associated ferroptosis genes.

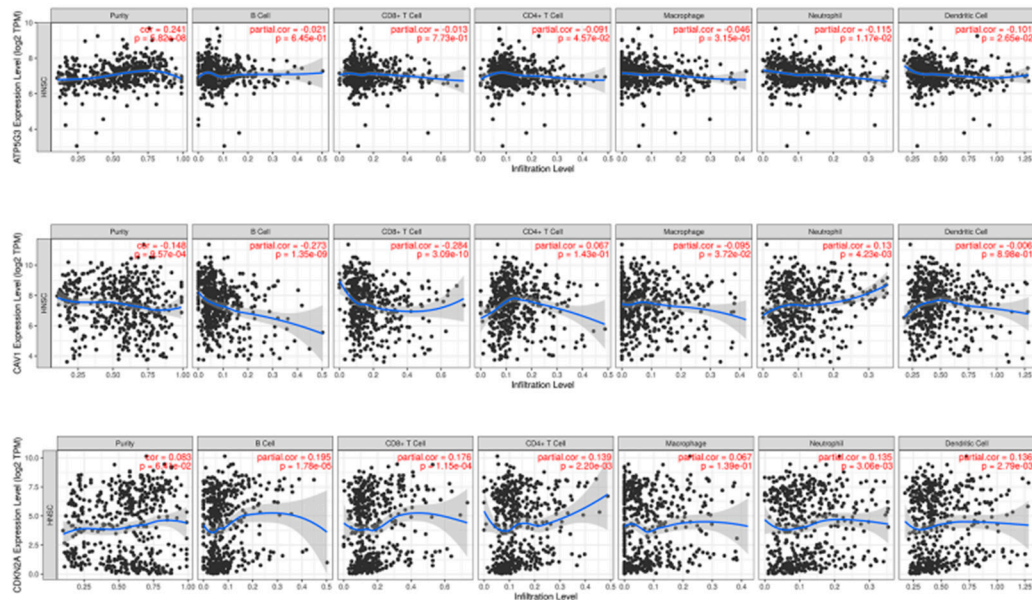

**Figure S2.** The Single immune gene infiltration characteristics of 12 cuproptosis-associated ferroptosis genes.

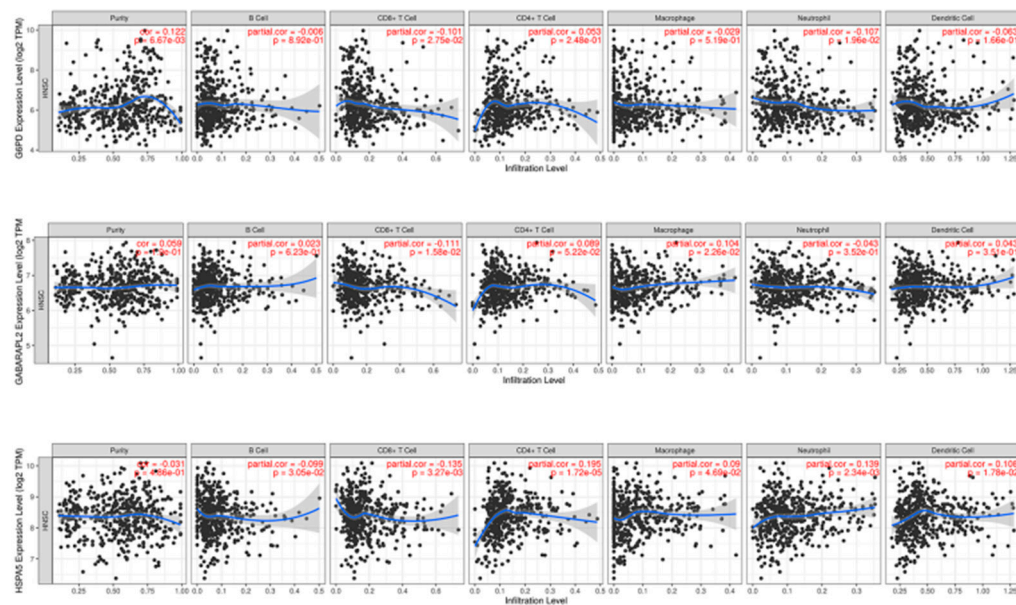

**Figure S3.** The Single immune gene infiltration characteristics of 12 cuproptosis-associated ferroptosis genes.

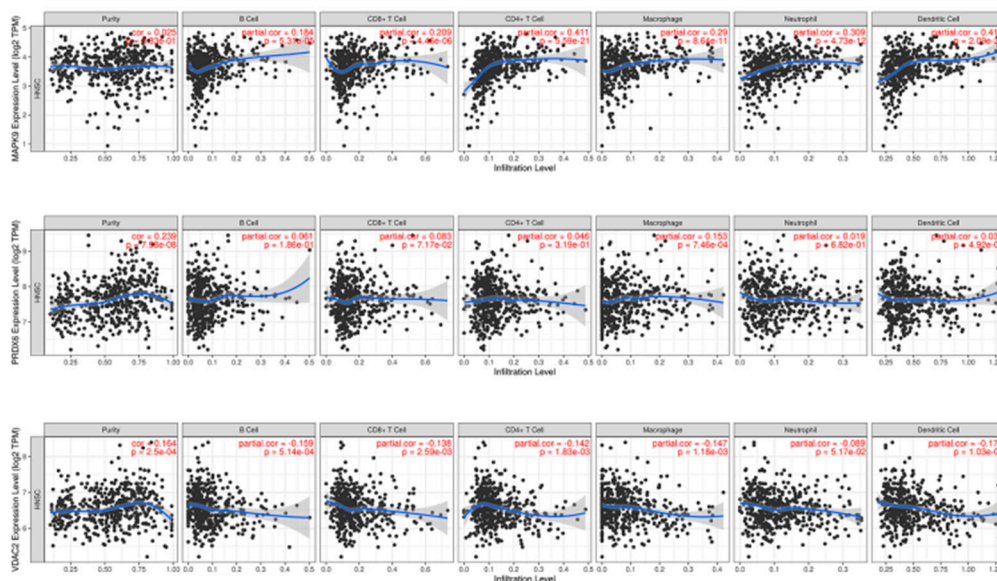

**Figure S4.** The Single immune gene infiltration characteristics of 12 cuproptosis-associated ferroptosis genes.

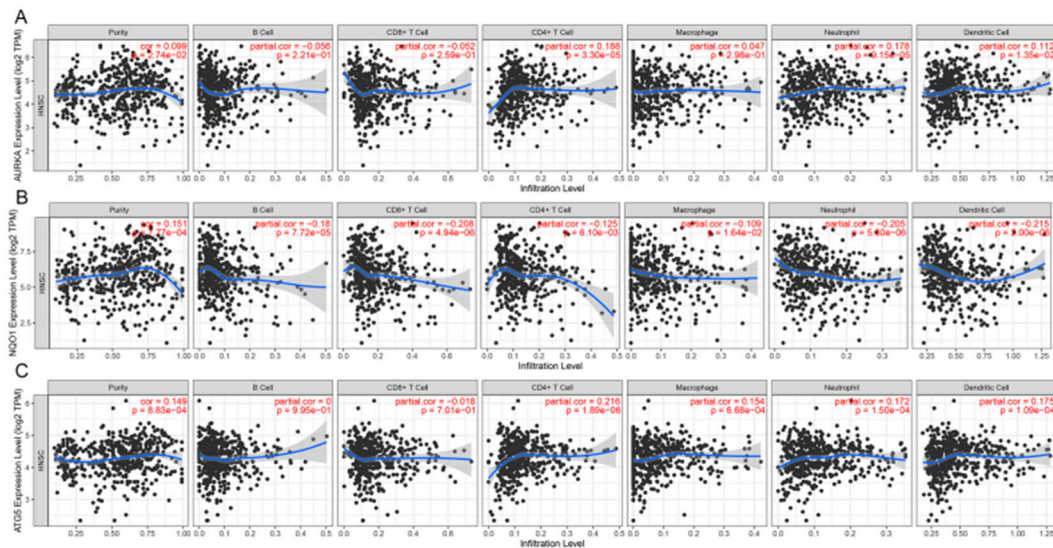

**Figure S5.** The pRRophetic algorithm to forecast drug sensitivity in the risk model.

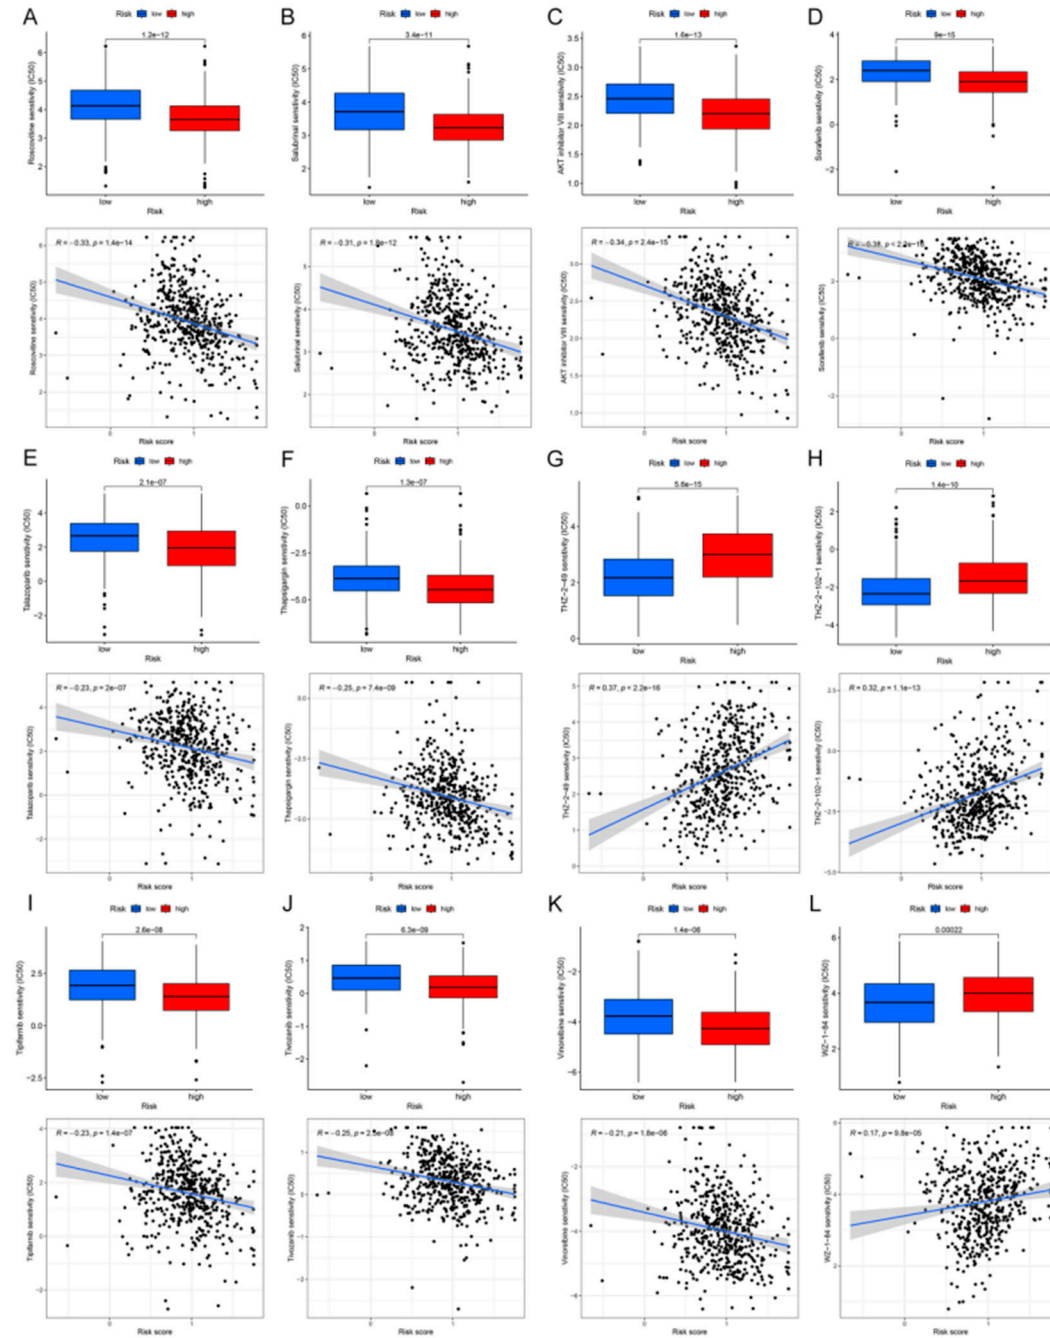



**Figure S6.** The RNA expression profiles of genes for which we constructed risk prognostic models.

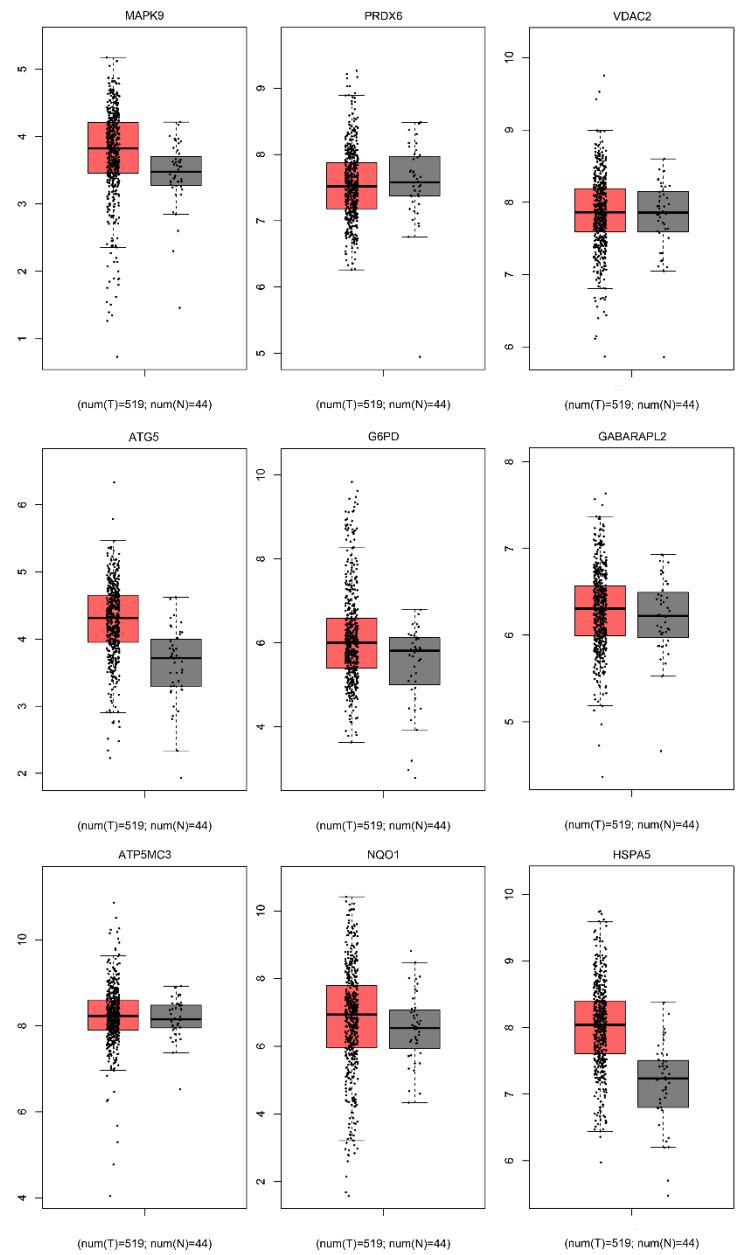

Supplement: s1 [file s1]
